# Supplementary material
Source: PubMed Central journal article supplement (PMC3732953)
Supplement: 1303371110_pnas.201303371SI.pdf [file 1303371110_pnas.201303371SI.pdf]

# Supporting Information

Bussell and Kehoe 10.1073/pnas.1303371110

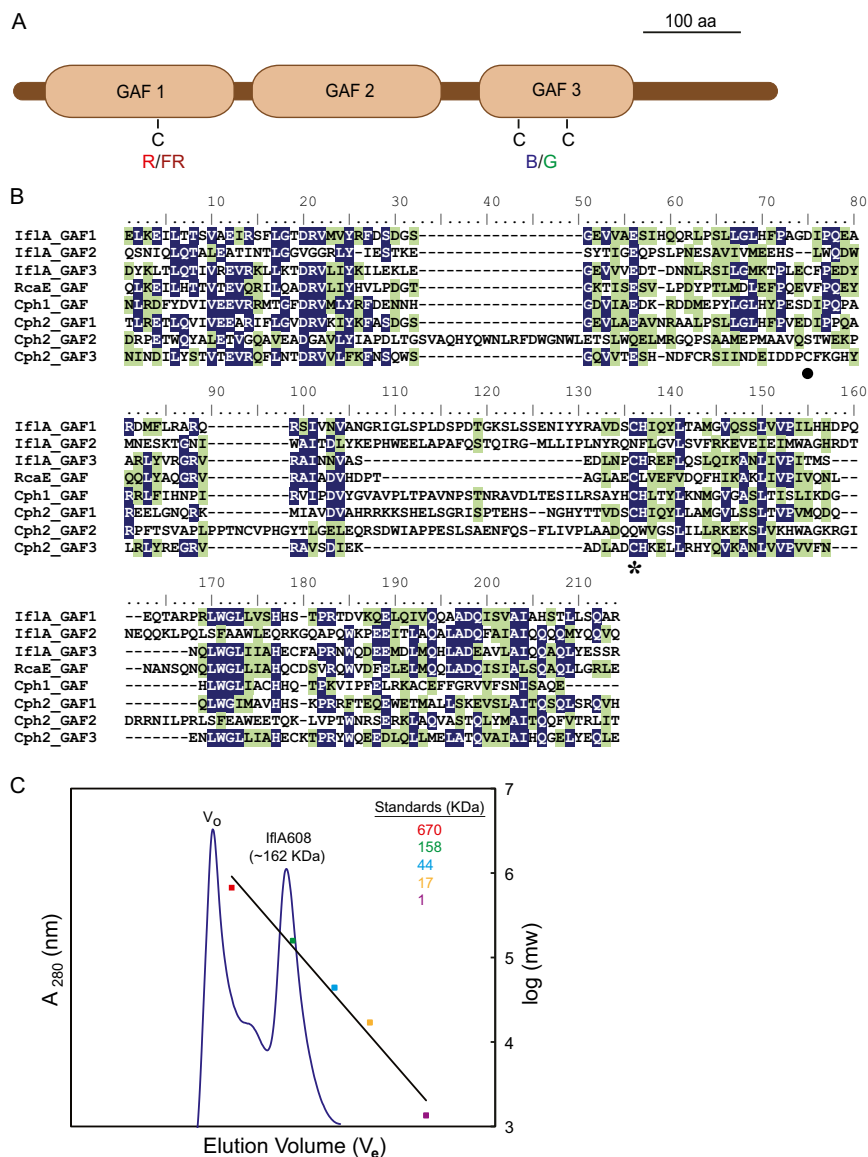

**Fig. S1.** IflA contains three GAF domains and is a dimer. (A) Schematic of IflA domain architecture, with the putative chromophore-binding cysteines in the red/far-red-responsive GAF1 and blue/green-responsive GAF3 domains. (B) Clustal W sequence alignments (1) of cyanobacterial phytochrome GAF domains. IflA and RcaE GAF domain sequences are from *Fremyella diplosiphon*, and Cph1 and Cph2 GAF domain sequences are from *Synechocystis* sp. PCC 6803. Blue shading denotes a minimum of 50% identical residues, and green shading represents a minimum of 50% similar residues at each position. The cysteine residue necessary for canonical phytochrome chromophore attachment is denoted by the star, whereas the cysteine required for chromophore attachment in the blue-green absorbing GAF domain subfamily is marked with a dot (2, 3). (C) IflA608 elution (peak indicated) from a size-exclusion column with various-sized standards provided. The experiment was conducted three times with similar results.  $V_0$ , void volume.

1. Thompson JD, Higgins DG, Gibson TJ (1994) CLUSTAL W: Improving the sensitivity of progressive multiple sequence alignment through sequence weighting, position-specific gap penalties and weight matrix choice. *Nucleic Acids Res* 22(22):4673–4680.
2. Rockwell NC, Martin SS, Gulevich AG, Lagarias JC (2012) Phycoviolobin formation and spectral tuning in the DXCF cyanobacteriochrome subfamily. *Biochemistry* 51(7):1449–1463.
3. Uljasz AT, et al. (2009) Cyanochromes are blue/green light photoreversible photoreceptors defined by a stable double cysteine linkage to a phycoviolobin-type chromophore. *J Biol Chem* 284(43):29757–29772.

















**Table S3. Primer sequences and expression plasmids used in this study**

| Primer sequence (lowercase sequences are restriction sites)                                                                                                                                                                                                                                                                                                                                                             | Plasmid                        | Protein                   |
|-------------------------------------------------------------------------------------------------------------------------------------------------------------------------------------------------------------------------------------------------------------------------------------------------------------------------------------------------------------------------------------------------------------------------|--------------------------------|---------------------------|
| 5'-GCCgagctcTTAACGCGCTTGACTGAGTAGGGTACT-3'<br>5'-CCAggatcccAGAACTTAAAGAGATATTAACACCAG-3'                                                                                                                                                                                                                                                                                                                                | pETDuet IflAGAF1               | IflA GAF1                 |
| 5'-GCCgagctcTTAGCGACTGCTTTCATATAATTGTGC-3'<br>5'-CCAggatcccAGACTACAACTTACCTTGCAAACATAT-3'                                                                                                                                                                                                                                                                                                                               | pETDuet IflAGAF3               | IflA GAF3                 |
| 5'-GCCgagctcTTAGCGACTGCTTTCATATAATTGTGC-3'<br>5'-CCAggatcccAATGACAGCAGTGACTGAGTACTCACA-3'                                                                                                                                                                                                                                                                                                                               | pETDuet IflA608                | IflA608                   |
| 5'-GCCgagctcTTAGCGACTGCTTTCATATAATTGTGC-3'<br>5'-TATTATCGAGCAGTAGACTCTGCCCATATTCAATATTTAACAGCA-3'<br>5'-TGCTGTAAAATATTGAATATGGGCAGAGTCTACTGCTCGATAATA-3'<br>5'-CCAggatcccAATGACAGCAGTGACTGAGTACTCACA-3'                                                                                                                                                                                                                 | pETDuet IflA608C141A           | IflA608 C141A             |
| 5'-GCCgagctcTTAGCGACTGCTTTCATATAATTGTGC-3'<br>5'-CCATTAGAAGCCTTCCCTGAAGACTATGCTCGTCTTTAC-3'<br>5'-TTCAGGGAAGGCTTCTAATGGGGTTTTTCATCCCCAA-3'                                                                                                                                                                                                                                                                              | pETDuet IflA608C511A           | IflA608 C511A             |
| 5'-CCAggatcccAATGACAGCAGTGACTGAGTACTCACA-3'<br>5'-GCCgagctcTTAGCGACTGCTTTCATATAATTGTGC-3'<br>5'-AACAAATGTAGCTTCCGAAGATTTGAATCCTGCTCATCGAGAATTT-3'<br>5'-AAATTCCTCGATGAGCAGGATTCAAATCTTCGGAAGCTACATTGTT-3'                                                                                                                                                                                                               | pETDuet IflA608C539A           | IflA608 C539A             |
| 5'-CCATTAGAAGCCTTCCCTGAAGACTATGCTCGTCTTTAC-3'<br>5'-TTCAGGGAAGGCTTCTAATGGGGTTTTTCATCCCCAA-3'<br>5'-GCCgagctcTTAGCGACTGCTTTCATATAATTGTGC-3'<br>5'-TATTATCGAGCAGTAGACTCTGCCCATATTCAATATTTAACAGCA-3'<br>5'-TGCTGTAAAATATTGAATATGGGCAGAGTCTACTGCTCGATAATA-3'<br>5'-CCAggatcccAATGACAGCAGTGACTGAGTACTCACA-3'                                                                                                                 | pETDuet IflA608C141AC511A      | IflA608 C141A C511A       |
| 5'-AACAAATGTAGCTTCCGAAGATTTGAATCCTGCTCATCGAGAATTT-3'<br>5'-AAATTCCTCGATGAGCAGGATTCAAATCTTCGGAAGCTACATTGTT-3'<br>5'-GCCgagctcTTAGCGACTGCTTTCATATAATTGTGC-3'<br>5'-TATTATCGAGCAGTAGACTCTGCCCATATTCAATATTTAACAGCA-3'<br>5'-TGCTGTAAAATATTGAATATGGGCAGAGTCTACTGCTCGATAATA-3'<br>5'-CCAggatcccAATGACAGCAGTGACTGAGTACTCACA-3'                                                                                                 | pETDuet IflA608C141AC539A      | IflA608 C141A C539A       |
| 5'-AACAAATGTAGCTTCCGAAGATTTGAATCCTGCTCATCGAGAATTT-3'<br>5'-AAATTCCTCGATGAGCAGGATTCAAATCTTCGGAAGCTACATTGTT-3'<br>5'-GCCgagctcTTAGCGACTGCTTTCATATAATTGTGC-3'<br>5'-CCATTAGAAGCCTTCCCTGAAGACTATGCTCGTCTTTAC-3'<br>5'-TTCAGGGAAGGCTTCTAATGGGGTTTTTCATCCCCAA-3'<br>5'-CCAggatcccAATGACAGCAGTGACTGAGTACTCACA-3'                                                                                                               | pETDuet IflA608C511AC539A      | IflA608 C511A C539A       |
| 5'-GCCgagctcTTAGCGACTGCTTTCATATAATTGTGC-3'<br>5'-AACAAATGTAGCTTCCGAAGATTTGAATCCTGCTCATCGAGAATTT-3'<br>5'-AAATTCCTCGATGAGCAGGATTCAAATCTTCGGAAGCTACATTGTT-3'<br>5'-CCATTAGAAGCCTTCCCTGAAGACTATGCTCGTCTTTAC-3'<br>5'-TTCAGGGAAGGCTTCTAATGGGGTTTTTCATCCCCAA-3'<br>5'-TATTATCGAGCAGTAGACTCTGCCCATATTCAATATTTAACAGCA-3'<br>5'-TGCTGTAAAATATTGAATATGGGCAGAGTCTACTGCTCGATAATA-3'<br>5'-CCAggatcccAATGACAGCAGTGACTGAGTACTCACA-3' | pETDuet IflA608C141AC511AC539A | IflA608 C141A C511A C539A |
